# Supplementary material for: Diethylenetriamine-assisted in situ synthesis of TiO2 nanoparticles on carbon nanotubes with well-defined structure and enhanced photocatalytic performance
Source: Royal Society of Chemistry journal article supplement (doi:10.1039/c7ra09324a), 2017-01-01
Supplement: c7ra09324a1.pdf [file c7ra09324a1.pdf]

SUPPLEMENTARY INFORMATION

**Diethylenetriamine-Assisted In-Situ Synthesis of TiO<sub>2</sub>  
nanoparticles on Carbon Nanotube with Well-Defined  
Structure and Enhanced Photocatalytic Performance**

*Hailong Peng<sup>1</sup>, Xiaoyan Yang<sup>2</sup>, Peng Zhang<sup>3</sup>, Yiming Zhang<sup>1</sup>, Chengwei Liu<sup>1</sup>, Dan Liu<sup>\*1</sup>,  
and Jianzhou Gui<sup>\*1, 3</sup>*

<sup>1</sup> State Key Laboratory of Separation Membranes & Membrane Processes, School of Environment and  
Chemical Engineering, Tianjin Polytechnic University, Tianjin 300387, China

<sup>2</sup> School of Chemistry and Chemical Engineering, Shangqiu Normal University,  
Shangqiu 476000, China

<sup>3</sup> State Key Laboratory of Separation Membranes & Membrane Processes, School of Material Science  
and Engineering, Tianjin Polytechnic University, Tianjin 300387, China

Corresponding Authors:

Tel: +86-022-83955668, E-mail: [ldan2000@163.com](mailto:ldan2000@163.com) (Dan Liu)

Tel: +86-022-83955668, E-mail: [jzgui@hotmail.com](mailto:jzgui@hotmail.com) (Jianzhou Gui)

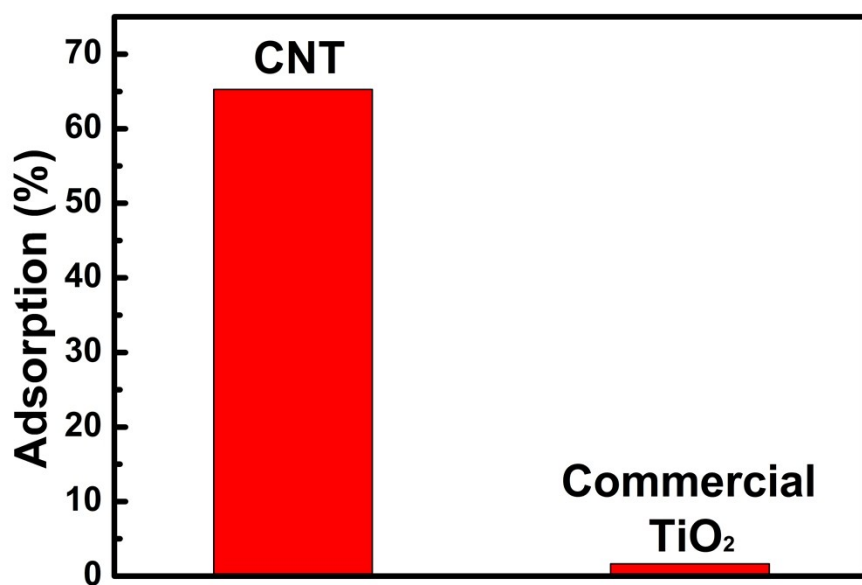

**Figure S1.** Adsorption capacity of CNT or commercial TiO<sub>2</sub> to MB aqueous solution

Note: 10 mg CNT or commercial TiO<sub>2</sub> was dispersed in 40 mL MB (20 mg/L) aqueous solution and magnetically stirred for 30 min in dark.

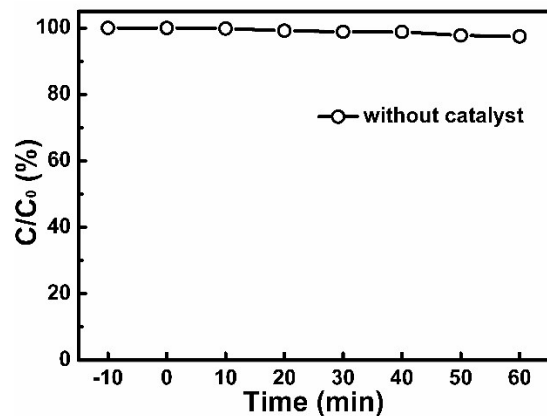

Figure S2. The photodegradation of MB without catalyst.

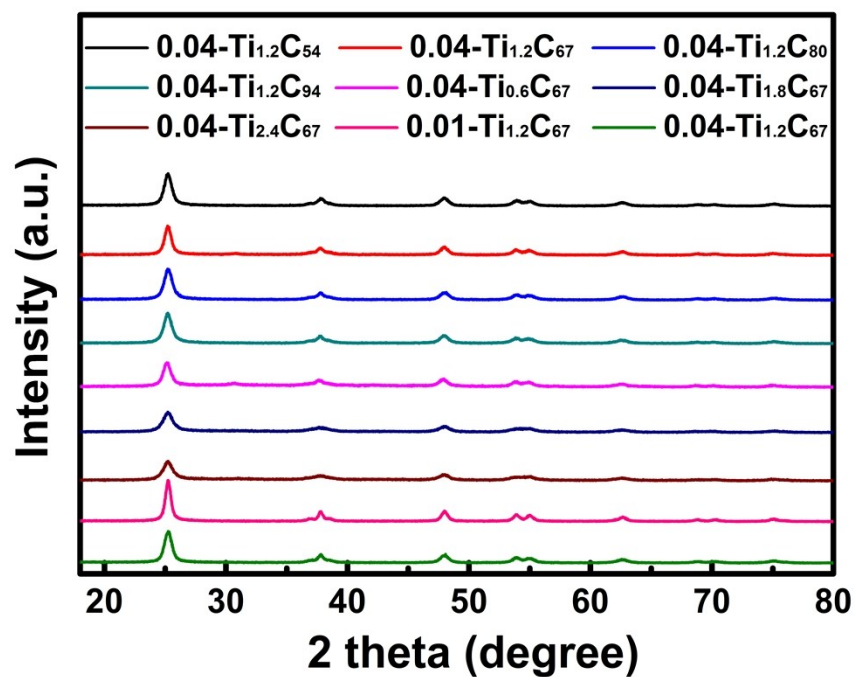

Figure S3. XRD patterns of various CNT/TiO<sub>2</sub> composites.

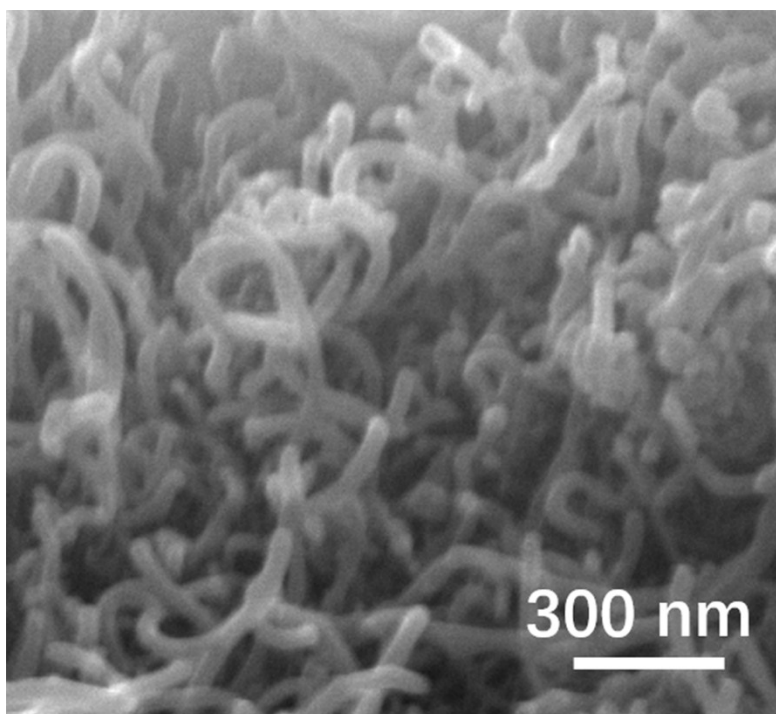

**Figure S4.** SEM image of CNT.

**Table S1. Theoretical compositions of CNT and TiO<sub>2</sub> in different samples and their MB adsorption capacity and apparent kinetic rate constants**

| <b>Samples</b>                         | <b>Adding amount of TiO<sub>2</sub> (mg)</b> | <b>Adding amount of CNT (mg)</b> | <b>TiO<sub>2</sub> (wt%)</b> | <b>CNT (wt%)</b> | <b>Adsorption ratio (%)</b> | <b>Reaction constant (min<sup>-1</sup>)</b> |
|----------------------------------------|----------------------------------------------|----------------------------------|------------------------------|------------------|-----------------------------|---------------------------------------------|
| 0.04-Ti <sub>0.6</sub> C <sub>67</sub> | 162                                          | 67                               | 71                           | 29               | 16.24                       | 0.0176                                      |
| 0.04-Ti <sub>1.2</sub> C <sub>67</sub> | 324                                          | 67                               | 83                           | 17               | 3.27                        | 0.0208                                      |
| 0.04-Ti <sub>1.8</sub> C <sub>67</sub> | 486                                          | 67                               | 88                           | 12               | 12.42                       | 0.0153                                      |
| 0.04-Ti <sub>2.4</sub> C <sub>67</sub> | 648                                          | 67                               | 91                           | 9                | 13.95                       | 0.0168                                      |
| 0.04-Ti <sub>1.2</sub> C <sub>54</sub> | 324                                          | 54                               | 86                           | 14               | 8.96                        | 0.0174                                      |
| 0.04-Ti <sub>1.2</sub> C <sub>67</sub> | 324                                          | 67                               | 83                           | 17               | 3.27                        | 0.0208                                      |
| 0.04-Ti <sub>1.2</sub> C <sub>80</sub> | 324                                          | 80                               | 80                           | 20               | 14.93                       | 0.0524                                      |
| 0.04-Ti <sub>1.2</sub> C <sub>94</sub> | 324                                          | 94                               | 78                           | 22               | 19.21                       | 0.0405                                      |
| 0-Ti <sub>1.2</sub> C <sub>67</sub>    | 324                                          | 67                               | 83                           | 17               | 15.31                       | 0.0175                                      |
| 0.01-Ti <sub>1.2</sub> C <sub>67</sub> | 324                                          | 67                               | 83                           | 17               | 10.32                       | 0.0592                                      |
| 0.02-Ti <sub>1.2</sub> C <sub>67</sub> | 324                                          | 67                               | 83                           | 17               | 4.41                        | 0.0653                                      |
| 0.04-Ti <sub>1.2</sub> C <sub>67</sub> | 324                                          | 67                               | 83                           | 17               | 3.27                        | 0.0208                                      |

**Table S2. Summary of surface compositions of 0.02-Ti<sub>1.2</sub>C<sub>67</sub> analyzed by XPS**

| eV    | C                                                                       | area    | at. % |
|-------|-------------------------------------------------------------------------|---------|-------|
| 284.7 | adventitious carbon and sp <sup>2</sup> -hybridized carbon from the CNT | 31069.1 | 37.75 |
| 285.3 | defect-containing sp <sup>3</sup> -hybridized carbons                   | 33685.3 | 40.92 |
| 286.5 | C-O                                                                     | 8041.9  | 9.77  |
| 288.9 | C-O-Ti                                                                  | 9515.05 | 11.56 |
| eV    | O                                                                       | area    | at. % |
| 529.8 | Ti-O-Ti                                                                 | 60887.8 | 53.54 |
| 532.1 | Ti-O-C                                                                  | 34197.4 | 30.07 |
| 533.5 | O=C or O-C                                                              | 18640.9 | 16.39 |
| eV    | Ti                                                                      | area    | at. % |
| 458.6 | Ti (IV) 2p <sub>1/2</sub>                                               | 49167.1 | 72.33 |
| 464.3 | Ti (IV) 2p <sub>3/2</sub>                                               | 18809.2 | 27.67 |

**Table S3. Summary of surface compositions of 0-Ti<sub>1.2</sub>C<sub>67</sub> analyzed by XPS**

| eV    | C                                                                          | area    | at. % |
|-------|----------------------------------------------------------------------------|---------|-------|
| 284.4 | adventitious carbon and sp <sup>2</sup> -hybridized<br>carbon from the CNT | 15828.3 | 29.37 |
| 284.9 | defect-containing sp <sup>3</sup> -hybridized carbons                      | 12403.9 | 23.02 |
| 285.8 | C-O                                                                        | 23428.1 | 43.48 |
| 289.1 | C-O-Ti                                                                     | 2228    | 4.13  |
| eV    | O                                                                          | area    | at. % |
| 529.7 | Ti-O-Ti                                                                    | 55508.1 | 81.76 |
| 531.6 | Ti-O-C                                                                     | 12381.3 | 18.24 |
| eV    | Ti                                                                         | area    | at. % |
| 458.6 | Ti (IV) 2p <sub>1/2</sub>                                                  | 45766   | 66.50 |
| 464.3 | Ti (IV)2p <sub>3/2</sub>                                                   | 23058   | 33.50 |

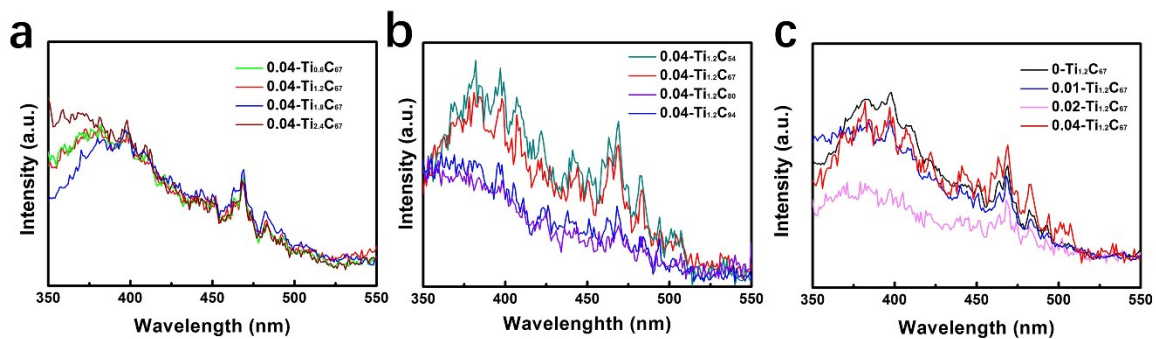

**Figure S5.** The PL spectra of three groups of samples measured at an excitation wavelength of 294 nm.



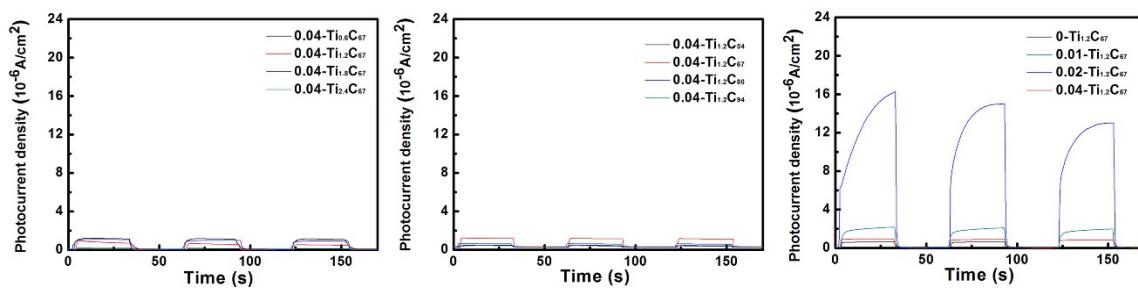

**Figure S6.** Photocurrent responses for all the samples in 0.1 M  $\text{Na}_2\text{SO}_4$  solution under UV-light irradiation.
